# Supplementary material
Source: publisher site journal article supplement (https://www.dovepress.com/article/424209)
Supplement: Supplementary file 1 [file get_supplementary_file.php]

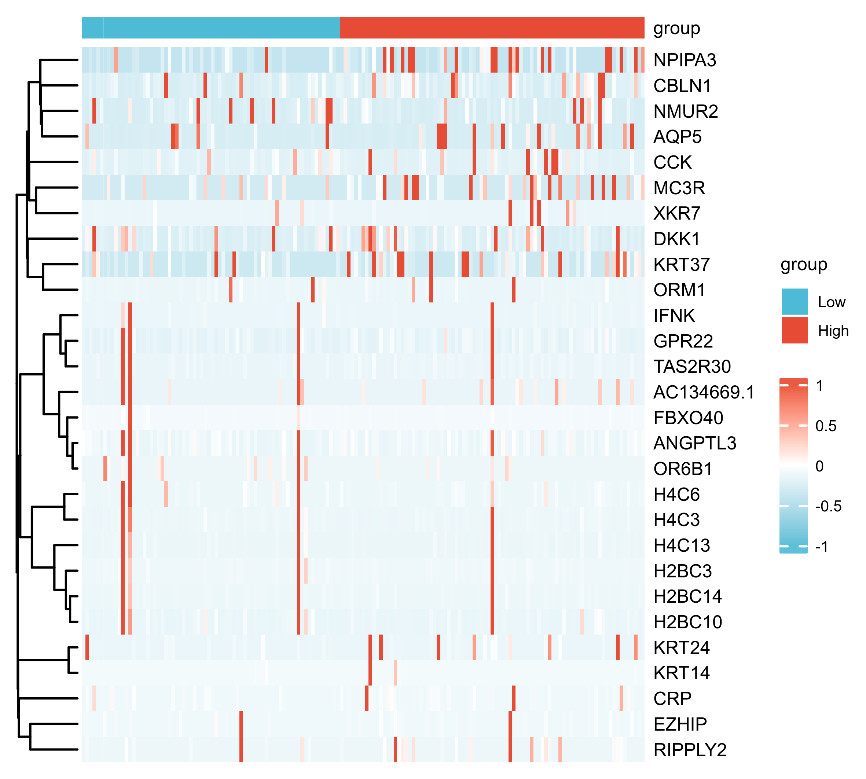


Figure S1 Heatmap of differentially expressed genes (DEGs) of BICDL1. Red represents high expression, and Blue represents a low expression.


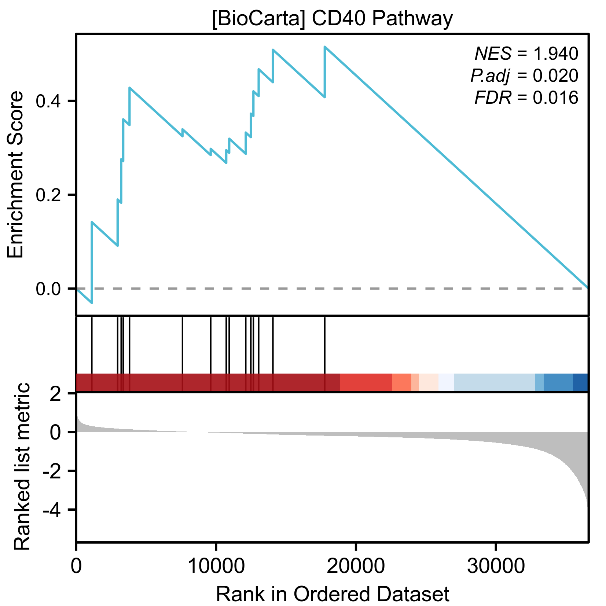


Figure S2 Enrichment of gens in CD40 pathway by GSEA

Figure S3 Enrichment of gens in Wnt pathway by GSEA
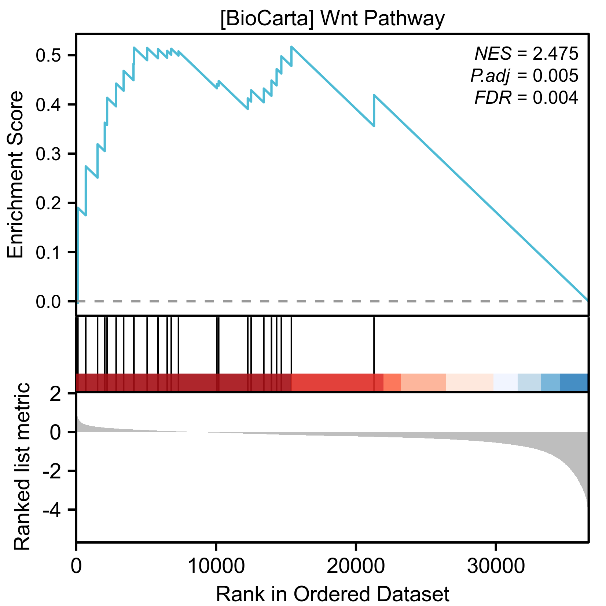


Box S1 Differentially expressed genes (DEGs) of BICDL1

| NPIPA3 MAGEC2 KRT37 KRT24 HOXC12 AP3B2 KRT16 OTOP3 RPRML KRT32 SLC22A31 KRT4 CDK5R2 PRSS33 BICDL1 KRT74 KRT35 ELFN2 DCAF4L2 EN2 H2BC3 IFNK FBXO40 H4C3 ANGPTL3 TAS2R30 AC134669.1 H4C13 GPR22 H2BC10 CRP ORM1 H2BC14 H4C6 OR6B1 FGL1 C12orf40 POU5F2 H1-3 H1-5 TSPYL6 GPR52 OR10A5 SMIM18 H3C2 AC093155.3 TAS2R3 PBOV1 H2AC21 H1-4 TAS2R50 H2AC14 ACSM6 PRSS48 H4C4 PRB4 MROH9 TAS2R43 OR2AG1 FSHR OR51I2 PLET1 AL138752.2 KCNJ13 AL133353.2 OR6A2 H3C11 H1-1 HIGD1C ALB LHCGR FLG2 AC098650.1 MROH2B OR56A1 OR52H1 OR9A4 OR2D3 H4C2 REG1B TAS2R13 PAPOLB TAS1R2 C4orf45 RHAG PATE4 OR56B1 TMPRSS11A HMGB4 ZIC1 OR8D4 REG3G DDI1 OR2D2 TRPC5 OR2M3 H2AC12 ZBTB20 TAS2R46 PZP CAV3 KCTD4 GDF10 MLN CYP4A22 AC020915.4 GPR151 DSPP AC090517.4 RNF113B HBG2 ERVFRD-1 TSBP1 OR13H1 AMER2 BTBD18 H2AC4 OR10G4 ANKUB1 AC008764.1 AC087632.2 OR2AT4 C9orf131 ZNF479 RS1 H3C3 TEX55 RTL1 TAS2R31 LIPF GPR101 OR56A4 MTRNR2L7 H2AC16 GK3P OR2F1 CRISP2 H3C12 AHSG OTX2 CPB1 TMPRSS12 AC025287.4 OR52I1 PSG2 OR10G7 HP IFIT1B REG1A RHOXF2 OR14J1 HBZ H2BC17 PATE1 PRSS55 GPR21 OR52B6 PSG5 DCAF8L2 TDRD15 AC091057.5 PPP1R42 ODF3 TMPRSS15 AWAT1 APOB PNLIPRP3 H3C1 NPAP1 ANKRD30A CCDC195 TAS2R39 H3C7 APCS MORC1 BPIFB2 ZNF716 TAS2R19 GCM2 ZFP42 MTRNR2L5 OR5A2 LRRTM3 OR52N1 TRHR VPREB1 OR52K1 PDC SPINK9 ADCY8 LIPN NKX6-2 DNTT SLC22A25 CPHXL CLEC1B OR13D1 MAS1 BOLL NPHP3-ACAD11 PTGDR LGALS14 OR56A3 CFHR2 DUXB HTR2C SLC12A1 CXCL8 OR10A2 PAQR9 ASB18 OR1N1 BEST3 MGAT4D MTRNR2L11 INSYN2B ACOT12 NBPF19 OR8D1 OR1J2 ASB15 PKD2L2 UPK1B OR52K2 TNNI3K COX7B2 SPINT4 OR51M1 TMEM212 H4C1 RAG2 H4C5 REG3A ETNPPL TFAP2B UGT1A4 OR1N2 SPDYE17 PSG8 FAM81B OR2L2 RTL4 C8A CCDC83 CHST9 FAM216B SLC15A5 ANKRD66 DEFB108B OR7D4 OR5AS1 C10orf53 CNMD CDKL4 OR2A14 OR52I2 BLID OR1A1 SLC6A15 MTRNR2L3 IQCJ MYH8 PRDM14 FAM217A UNC13C VWC2L GP2 OR5AN1 DEFA6 MYH2 NXPH2 PSG6 UBQLN3 OR6M1 SCN10A RGS21 FEZF2 AC005520.1 APOC3 INSL5 DPPA4 UGT2B10 SYT16 TCHHL1 GUCY2F TRPM1 OR10A4 LIN28A DEFA5 HBG1 HPR PTH SLC22A24 C21orf62 VXN CT45A1 REC114 ADAM20 ADAM2 FGG H4C11 L1TD1 LIN28B ADAD1 CBLIF H2BC13 S100G ELOA2 AFM GABRR3 SLC35F4 KCNH5 CCDC196 BOD1L2 OR4K2 AC013477.1 AP001267.5 TMPRSS11D MYH1 SFTPB TBXT AC073082.1 MAGEA9B AMELY SULT1C3 SERPINA7 TMPRSS11F VSTM2B OR5A1 CLRN1 TSPAN19 LRP1B CLEC2A LCN15 SPIN2A SLC17A2 OR4F15 NUP210L GALNT14 ETDC CAPSL PCDH11X SFTPA1 PRDM7 GRM5 S100A12 SAXO1 MAP3K19 ANGPTL7 RHBDL3 H2AC13 DGKB FGF23 OR6Y1 ANKRD30BL H2AP CALN1 GALNTL5 TTR AL049697.1 FPGT-TNNI3K AC012309.1 OR51B4 ZNF460 SLC2A2 C1orf87 INSL4 SPDYE3 ZIC4 INSL6 PSG4 GPR26 GNRHR WEE2 ATP5MGL DLEU7 OR52A1 OPN5 CXCL5 CYP3A7-CYP3A51P CCDC169 IAPP SLC17A3 RGS13 GRM1 AQP4 NOTCH2NLA LYPD2 TMCO5A LMNTD1 GPRC6A UMOD GPR82 SCRG1 OR9I1 GMCL2 TMEM210 C4orf51 KLK12 ZC3H11A CGA PROK2 AGTR2 APOBEC4 TECTB FRG2C H2AC7 TRIML2 PRSS37 AC013394.1 CD200R1L SULT1C4 CIB4 SLC22A8 OR13G1 FAM47A LRRC63 OSTN |
| --- |

Explanation: |LogFC|>1&p.adj<0.05

Box S2 BICDL1-associated gens

| SFSWAP MAST2 STAT6 TAOK2 NDOR1 SETD1B DPP9 PXN DDX51 KMT2B MAP11 SETD1A RBM19 RNF10 PIP4K2C NCOR2 TPCN1 CEP170B ATXN2L KMT5A SAMD4B MADD PLEC RAB35 FBRS PHRF1 ZC3H4 DHX37 HIP1R PPP6R1 GATAD2A ATN1 CTTN MAFK SMARCD1 |
| --- |

Explanation: |Cor|>0.5 & pvalue<0.05

Table S1 GO and KEGG enrichment analysis

| ONTOLOGY | ID | Description | GeneRatio | BgRatio | pvalue | p.adjust | qvalue |
| --- | --- | --- | --- | --- | --- | --- | --- |
| BP | GO:0050907 | detection of chemical stimulus involved in sensory perception | 60/350 | 478/18800 | 1.80405E-32 | 4.32251E-29 | 4.30884E-29 |
| GO:0050911 | detection of chemical stimulus involved in sensory perception of smell | 51/350 | 432/18800 | 2.4167E-26 | 2.8952E-23 | 2.88605E-23 |
| GO:0007608 | sensory perception of smell | 51/350 | 458/18800 | 3.76012E-25 | 3.00308E-22 | 2.99358E-22 |
| GO:0006334 | nucleosome assembly | 24/350 | 126/18800 | 9.72487E-18 | 5.8252E-15 | 5.80677E-15 |
| GO:0006335 | DNA replication-dependent chromatin assembly | 14/350 | 32/18800 | 1.61549E-16 | 6.45117E-14 | 6.43077E-14 |
| GO:0034723 | DNA replication-dependent chromatin organization | 14/350 | 32/18800 | 1.61549E-16 | 6.45117E-14 | 6.43077E-14 |
| GO:0034728 | nucleosome organization | 24/350 | 159/18800 | 2.47544E-15 | 8.47307E-13 | 8.44626E-13 |
| GO:0065004 | protein-DNA complex assembly | 24/350 | 203/18800 | 6.26793E-13 | 1.87724E-10 | 1.87131E-10 |
| GO:0031497 | chromatin assembly | 24/350 | 205/18800 | 7.77863E-13 | 2.07084E-10 | 2.06429E-10 |
| GO:0071824 | protein-DNA complex subunit organization | 24/350 | 237/18800 | 1.79192E-11 | 4.29343E-09 | 4.27985E-09 |
| GO:0006338 | chromatin remodeling | 24/350 | 266/18800 | 2.00787E-10 | 4.3735E-08 | 4.35966E-08 |
| GO:0045653 | negative regulation of megakaryocyte differentiation | 8/350 | 18/18800 | 4.95692E-10 | 9.89732E-08 | 9.86601E-08 |
| GO:0050912 | detection of chemical stimulus involved in sensory perception of taste | 9/350 | 43/18800 | 7.82628E-08 | 1.44244E-05 | 1.43788E-05 |
| GO:0006336 | DNA replication-independent chromatin assembly | 8/350 | 33/18800 | 1.23232E-07 | 2.10903E-05 | 2.10236E-05 |
| GO:0034724 | DNA replication-independent chromatin organization | 8/350 | 34/18800 | 1.58554E-07 | 2.53263E-05 | 2.52462E-05 |
| GO:0045652 | regulation of megakaryocyte differentiation | 8/350 | 36/18800 | 2.55812E-07 | 3.83079E-05 | 3.81867E-05 |
| GO:0001580 | detection of chemical stimulus involved in sensory perception of bitter taste | 8/350 | 37/18800 | 3.21126E-07 | 4.52599E-05 | 4.51167E-05 |
| GO:0050913 | sensory perception of bitter taste | 8/350 | 41/18800 | 7.4479E-07 | 9.91398E-05 | 9.88262E-05 |
| GO:0015669 | gas transport | 6/350 | 21/18800 | 1.70925E-06 | 0.000215545 | 0.000214863 |
| GO:0061844 | antimicrobial humoral immune response mediated by antimicrobial peptide | 10/350 | 79/18800 | 2.02772E-06 | 0.000242921 | 0.000242153 |
| GO:0032200 | telomere organization | 14/350 | 162/18800 | 2.13281E-06 | 0.000243343 | 0.000242573 |
| GO:0050909 | sensory perception of taste | 9/350 | 63/18800 | 2.36741E-06 | 0.000257833 | 0.000257017 |
| GO:0035821 | modulation of process of another organism | 6/350 | 25/18800 | 5.23813E-06 | 0.000545676 | 0.00054395 |
| GO:0030219 | megakaryocyte differentiation | 8/350 | 57/18800 | 9.94E-06 | 0.000992343 | 0.000989204 |
| GO:0006953 | acute-phase response | 7/350 | 48/18800 | 2.78806E-05 | 0.00267208 | 0.002663628 |
| GO:0045638 | negative regulation of myeloid cell differentiation | 9/350 | 91/18800 | 4.96491E-05 | 0.004575356 | 0.004560883 |
| GO:0055062 | phosphate ion homeostasis | 4/350 | 13/18800 | 7.39202E-05 | 0.006325454 | 0.006305445 |
| GO:0072506 | trivalent inorganic anion homeostasis | 4/350 | 13/18800 | 7.39202E-05 | 0.006325454 | 0.006305445 |
| GO:0019730 | antimicrobial humoral response | 10/350 | 122/18800 | 9.57317E-05 | 0.007909416 | 0.007884397 |
| GO:0045109 | intermediate filament organization | 7/350 | 68/18800 | 0.000267046 | 0.021328082 | 0.021260618 |
| GO:1900118 | negative regulation of execution phase of apoptosis | 4/350 | 21/18800 | 0.000549995 | 0.042509329 | 0.042374865 |
| GO:0055081 | anion homeostasis | 5/350 | 39/18800 | 0.000743896 | 0.055699228 | 0.055523042 |
| GO:0006352 | DNA-templated transcription, initiation | 9/350 | 134/18800 | 0.000920042 | 0.066800607 | 0.066589306 |
| GO:0002526 | acute inflammatory response | 8/350 | 113/18800 | 0.001250959 | 0.08703549 | 0.086760182 |
| GO:0045104 | intermediate filament cytoskeleton organization | 7/350 | 88/18800 | 0.001274298 | 0.08703549 | 0.086760182 |
| GO:2000272 | negative regulation of signaling receptor activity | 6/350 | 65/18800 | 0.001307712 | 0.08703549 | 0.086760182 |
| GO:0045103 | intermediate filament-based process | 7/350 | 89/18800 | 0.001361429 | 0.088161712 | 0.087882842 |
| GO:0010469 | regulation of signaling receptor activity | 10/350 | 173/18800 | 0.001534609 | 0.096761155 | 0.096455083 |
| CC | GO:0000786 | nucleosome | 29/373 | 129/19594 | 4.63847E-23 | 1.2663E-20 | 1.20112E-20 |
| GO:0044815 | DNA packaging complex | 29/373 | 198/19594 | 1.23202E-17 | 1.6817E-15 | 1.59514E-15 |
| GO:0032993 | protein-DNA complex | 30/373 | 220/19594 | 2.56949E-17 | 2.33824E-15 | 2.21788E-15 |
| GO:0043505 | CENP-A containing nucleosome | 9/373 | 18/19594 | 1.24666E-11 | 6.80675E-10 | 6.45637E-10 |
| GO:0061638 | CENP-A containing chromatin | 9/373 | 18/19594 | 1.24666E-11 | 6.80675E-10 | 6.45637E-10 |
| GO:0034506 | chromosome, centromeric core domain | 9/373 | 19/19594 | 2.32907E-11 | 1.05973E-09 | 1.00518E-09 |
| GO:0031838 | haptoglobin-hemoglobin complex | 4/373 | 11/19594 | 3.83625E-05 | 0.001496136 | 0.001419122 |
| GO:0072562 | blood microparticle | 11/373 | 147/19594 | 0.000120639 | 0.003872323 | 0.003672996 |
| GO:0000228 | nuclear chromosome | 14/373 | 228/19594 | 0.000127659 | 0.003872323 | 0.003672996 |
| GO:0005833 | hemoglobin complex | 3/373 | 12/19594 | 0.001324929 | 0.036170569 | 0.034308695 |
| GO:0005859 | muscle myosin complex | 3/373 | 15/19594 | 0.002626449 | 0.065183691 | 0.061828371 |
| MF | GO:0004984 | olfactory receptor activity | 51/361 | 430/18410 | 2.16733E-25 | 8.73435E-23 | 8.23586E-23 |
| GO:0046982 | protein heterodimerization activity | 28/361 | 332/18410 | 9.77385E-11 | 1.96943E-08 | 1.85703E-08 |
| GO:0008527 | taste receptor activity | 9/361 | 26/18410 | 9.03614E-10 | 1.21386E-07 | 1.14458E-07 |
| GO:0033038 | bitter taste receptor activity | 8/361 | 20/18410 | 2.07534E-09 | 2.09091E-07 | 1.97157E-07 |
| GO:0048019 | receptor antagonist activity | 6/361 | 32/18410 | 3.21103E-05 | 0.002588093 | 0.002440385 |
| GO:0004252 | serine-type endopeptidase activity | 13/361 | 174/18410 | 4.05891E-05 | 0.002726233 | 0.002570641 |
| GO:0008236 | serine-type peptidase activity | 13/361 | 191/18410 | 0.000105539 | 0.006076031 | 0.00572926 |
| GO:0017171 | serine hydrolase activity | 13/361 | 195/18410 | 0.000129957 | 0.006543661 | 0.006170202 |
| GO:0005179 | hormone activity | 10/361 | 122/18410 | 0.000146136 | 0.006543661 | 0.006170202 |
| GO:0070492 | oligosaccharide binding | 4/361 | 15/18410 | 0.000167252 | 0.006600369 | 0.006223673 |
| GO:0030547 | signaling receptor inhibitor activity | 6/361 | 43/18410 | 0.000180159 | 0.006600369 | 0.006223673 |
| GO:0042834 | peptidoglycan binding | 4/361 | 18/18410 | 0.000357881 | 0.012018845 | 0.011332906 |
| GO:0005549 | odorant binding | 9/361 | 119/18410 | 0.000564802 | 0.017508859 | 0.016509594 |
| GO:0031720 | haptoglobin binding | 3/361 | 10/18410 | 0.000809937 | 0.023314627 | 0.021984016 |
| GO:0005344 | oxygen carrier activity | 3/361 | 14/18410 | 0.002317684 | 0.059031386 | 0.055662349 |
| GO:0070325 | lipoprotein particle receptor binding | 4/361 | 29/18410 | 0.002343678 | 0.059031386 | 0.055662349 |
| GO:0055102 | lipase inhibitor activity | 3/361 | 17/18410 | 0.004145143 | 0.098264267 | 0.092656133 |
| KEGG | hsa04740 | Olfactory transduction | 51/180 | 439/8164 | 5.24952E-24 | 9.13416E-22 | 8.89655E-22 |
| hsa05322 | Systemic lupus erythematosus | 27/180 | 136/8164 | 7.83606E-19 | 6.81737E-17 | 6.64003E-17 |
| hsa04613 | Neutrophil extracellular trap formation | 27/180 | 190/8164 | 5.48968E-15 | 3.18402E-13 | 3.10119E-13 |
| hsa05034 | Alcoholism | 26/180 | 187/8164 | 3.1338E-14 | 1.3632E-12 | 1.32774E-12 |
| hsa04742 | Taste transduction | 12/180 | 86/8164 | 3.37745E-07 | 1.17535E-05 | 1.14478E-05 |
| hsa04080 | Neuroactive ligand-receptor interaction | 21/180 | 362/8164 | 4.39831E-05 | 0.00127551 | 0.00124233 |
| hsa05150 | Staphylococcus aureus infection | 9/180 | 96/8164 | 0.000251262 | 0.006245645 | 0.006083175 |
| hsa05203 | Viral carcinogenesis | 13/180 | 204/8164 | 0.000554637 | 0.012063352 | 0.011749544 |

Table S2 GSEA enrichment analysis

| ID | setSize | enrichmentScore | NES | pvalue | p.adjust | qvalue |
| --- | --- | --- | --- | --- | --- | --- |
| REACTOME_HDACS_DEACETYLATE_HISTONES | 91 | -0.746106593 | -1.697319311 | 1E-10 | 7.58E-08 | 6.11053E-08 |
| REACTOME_HCMV_LATE_EVENTS | 113 | -0.725377691 | -1.663688903 | 1E-10 | 7.58E-08 | 6.11053E-08 |
| REACTOME_TRANSCRIPTIONAL_REGULATION_OF_GRANULOPOIESIS | 87 | -0.743428462 | -1.690615846 | 1.94957E-10 | 9.85182E-08 | 7.94193E-08 |
| REACTOME_RHO_GTPASES_ACTIVATE_PKNS | 91 | -0.725749922 | -1.651009881 | 1.36016E-09 | 2.57751E-07 | 2.07783E-07 |
| REACTOME_TRANSCRIPTIONAL_REGULATION_BY_SMALL_RNAS | 104 | -0.71257677 | -1.631255818 | 9.46551E-10 | 2.57751E-07 | 2.07783E-07 |
| REACTOME_HATS_ACETYLATE_HISTONES | 139 | -0.690783767 | -1.598396446 | 8.19287E-10 | 2.57751E-07 | 2.07783E-07 |
| REACTOME_HCMV_EARLY_EVENTS | 135 | -0.688878192 | -1.591361902 | 1.28062E-09 | 2.57751E-07 | 2.07783E-07 |
| REACTOME_RUNX1_REGULATES_TRANSCRIPTION_OF_GENES_INVOLVED_IN_DIFFERENTIATION_OF_HSCS | 127 | -0.69045369 | -1.591195985 | 1.21699E-09 | 2.57751E-07 | 2.07783E-07 |
| REACTOME_ASSEMBLY_OF_THE_ORC_COMPLEX_AT_THE_ORIGIN_OF_REPLICATION | 66 | -0.765133488 | -1.718436189 | 1.93442E-09 | 3.02953E-07 | 2.44222E-07 |
| REACTOME_RNA_POLYMERASE_I_PROMOTER_ESCAPE | 85 | -0.736502192 | -1.673531143 | 1.99837E-09 | 3.02953E-07 | 2.44222E-07 |
| REACTOME_PRC2_METHYLATES_HISTONES_AND_DNA | 70 | -0.758675409 | -1.708635937 | 2.28613E-09 | 3.03884E-07 | 2.44972E-07 |
| REACTOME_RMTS_METHYLATE_HISTONE_ARGININES | 76 | -0.74863088 | -1.693336195 | 2.57389E-09 | 3.03884E-07 | 2.44972E-07 |
| REACTOME_HCMV_INFECTION | 159 | -0.66758701 | -1.552823845 | 2.60586E-09 | 3.03884E-07 | 2.44972E-07 |
| REACTOME_SIRT1_NEGATIVELY_REGULATES_RRNA_EXPRESSION | 65 | -0.763048865 | -1.711616035 | 4.46631E-09 | 3.12198E-07 | 2.51674E-07 |
| REACTOME_ERCC6_CSB_AND_EHMT2_G9A_POSITIVELY_REGULATE_RRNA_EXPRESSION | 73 | -0.752108375 | -1.699167211 | 2.9256E-09 | 3.12198E-07 | 2.51674E-07 |
| REACTOME_DNA_DAMAGE_TELOMERE_STRESS_INDUCED_SENESCENCE | 79 | -0.736165852 | -1.668026152 | 4.53057E-09 | 3.12198E-07 | 2.51674E-07 |
| REACTOME_B_WICH_COMPLEX_POSITIVELY_REGULATES_RRNA_EXPRESSION | 85 | -0.733343067 | -1.666352762 | 3.21336E-09 | 3.12198E-07 | 2.51674E-07 |
| REACTOME_POSITIVE_EPIGENETIC_REGULATION_OF_RRNA_EXPRESSION | 100 | -0.71246563 | -1.628304194 | 3.88795E-09 | 3.12198E-07 | 2.51674E-07 |
| REACTOME_NEGATIVE_EPIGENETIC_REGULATION_OF_RRNA_EXPRESSION | 103 | -0.710417892 | -1.626011069 | 4.33779E-09 | 3.12198E-07 | 2.51674E-07 |
| REACTOME_DISEASES_OF_PROGRAMMED_CELL_DEATH | 100 | -0.711062211 | -1.625096752 | 4.53057E-09 | 3.12198E-07 | 2.51674E-07 |
| REACTOME_RNA_POLYMERASE_I_TRANSCRIPTION | 105 | -0.705578682 | -1.615425852 | 4.27352E-09 | 3.12198E-07 | 2.51674E-07 |
| KEGG_SYSTEMIC_LUPUS_ERYTHEMATOSUS | 134 | -0.678393746 | -1.566272437 | 3.56664E-09 | 3.12198E-07 | 2.51674E-07 |
| REACTOME_ACTIVATED_PKN1_STIMULATES_TRANSCRIPTION_OF_AR_ANDROGEN_RECEPTOR_REGULATED_GENES_KLK2_AND_KLK3 | 64 | -0.765567895 | -1.716510248 | 5.49451E-09 | 3.6216E-07 | 2.91951E-07 |
| REACTOME_DNA_METHYLATION | 62 | -0.766959707 | -1.720956647 | 7.03935E-09 | 4.26866E-07 | 3.44113E-07 |
| REACTOME_MEIOTIC_RECOMBINATION | 84 | -0.727362681 | -1.651662247 | 6.91019E-09 | 4.26866E-07 | 3.44113E-07 |
| REACTOME_CONDENSATION_OF_PROPHASE_CHROMOSOMES | 71 | -0.752035737 | -1.695575346 | 7.68514E-09 | 4.48103E-07 | 3.61233E-07 |
| REACTOME_SENESCENCE_ASSOCIATED_SECRETORY_PHENOTYPE_SASP | 109 | -0.698801416 | -1.600490043 | 8.07262E-09 | 4.53263E-07 | 3.65392E-07 |
| REACTOME_RUNX1_REGULATES_GENES_INVOLVED_IN_MEGAKARYOCYTE_DIFFERENTIATION_AND_PLATELET_FUNCTION | 95 | -0.707943722 | -1.614443642 | 1.16891E-08 | 6.3288E-07 | 5.10189E-07 |
| REACTOME_ESTROGEN_DEPENDENT_GENE_EXPRESSION | 147 | -0.662814563 | -1.539197862 | 1.25932E-08 | 6.58321E-07 | 5.30697E-07 |
| REACTOME_FORMATION_OF_THE_BETA_CATENIN_TCF_TRANSACTIVATING_COMPLEX | 89 | -0.715012909 | -1.626517554 | 2.63492E-08 | 1.33151E-06 | 1.07338E-06 |
| REACTOME_PRE_NOTCH_EXPRESSION_AND_PROCESSING | 117 | -0.677906691 | -1.556784311 | 5.13933E-08 | 2.5133E-06 | 2.02607E-06 |
| REACTOME_INHIBITION_OF_DNA_RECOMBINATION_AT_TELOMERE | 67 | -0.73381089 | -1.648940062 | 5.50559E-08 | 2.57741E-06 | 2.07775E-06 |
| REACTOME_EPIGENETIC_REGULATION_OF_GENE_EXPRESSION | 142 | -0.658044162 | -1.524417951 | 5.61045E-08 | 2.57741E-06 | 2.07775E-06 |
| REACTOME_OXIDATIVE_STRESS_INDUCED_SENESCENCE | 121 | -0.668356273 | -1.536231305 | 7.07857E-08 | 3.15621E-06 | 2.54434E-06 |
| REACTOME_AMYLOID_FIBER_FORMATION | 107 | -0.683219737 | -1.564787222 | 8.12723E-08 | 3.52025E-06 | 2.83781E-06 |
| REACTOME_MITOTIC_PROPHASE | 140 | -0.656772675 | -1.519534508 | 8.96616E-08 | 3.75963E-06 | 3.03078E-06 |
| REACTOME_DNA_REPLICATION_PRE_INITIATION | 157 | -0.648872764 | -1.50939295 | 9.17589E-08 | 3.75963E-06 | 3.03078E-06 |
| REACTOME_BASE_EXCISION_REPAIR_AP_SITE_FORMATION | 62 | -0.745555745 | -1.672928972 | 1.4227E-07 | 5.67584E-06 | 4.57551E-06 |
| REACTOME_BASE_EXCISION_REPAIR | 90 | -0.698026397 | -1.58907462 | 1.92855E-07 | 7.38908E-06 | 5.95661E-06 |
| REACTOME_CELLULAR_SENESCENCE | 193 | -0.621823263 | -1.455721763 | 1.94962E-07 | 7.38908E-06 | 5.95661E-06 |
| REACTOME_RECOGNITION_AND_ASSOCIATION_OF_DNA_GLYCOSYLASE_WITH_SITE_CONTAINING_AN_AFFECTED_PURINE | 55 | -0.754472187 | -1.681144016 | 2.27094E-07 | 8.39693E-06 | 6.76908E-06 |
| REACTOME_DEPOSITION_OF_NEW_CENPA_CONTAINING_NUCLEOSOMES_AT_THE_CENTROMERE | 72 | -0.718331815 | -1.621084575 | 3.02891E-07 | 1.09329E-05 | 8.81344E-06 |
| REACTOME_MEIOSIS | 116 | -0.662473026 | -1.52072411 | 4.21504E-07 | 1.48605E-05 | 1.19796E-05 |
| REACTOME_NONHOMOLOGOUS_END_JOINING_NHEJ | 67 | -0.714373574 | -1.605262639 | 6.59858E-07 | 2.27351E-05 | 1.83276E-05 |
| REACTOME_GENE_SILENCING_BY_RNA | 137 | -0.642893739 | -1.486891601 | 9.15535E-07 | 3.08434E-05 | 2.4864E-05 |
| REACTOME_PD_1_SIGNALING | 26 | 0.607294241 | 2.915934174 | 1.31111E-06 | 4.32096E-05 | 3.48329E-05 |
| REACTOME_ACTIVATION_OF_ANTERIOR_HOX_GENES_IN_HINDBRAIN_DEVELOPMENT_DURING_EARLY_EMBRYOGENESIS | 119 | -0.655659653 | -1.506225739 | 1.80572E-06 | 5.79949E-05 | 4.67519E-05 |
| REACTOME_REPRODUCTION | 142 | -0.631503092 | -1.462933195 | 1.87451E-06 | 5.79949E-05 | 4.67519E-05 |
| REACTOME_DNA_REPLICATION | 185 | -0.612524958 | -1.4319757 | 1.84011E-06 | 5.79949E-05 | 4.67519E-05 |
| REACTOME_MEIOTIC_SYNAPSIS | 78 | -0.689916329 | -1.562729701 | 2.04647E-06 | 6.20491E-05 | 5.00202E-05 |
| REACTOME_G2_M_DNA_DAMAGE_CHECKPOINT | 93 | -0.6716358 | -1.530882769 | 2.32163E-06 | 6.90114E-05 | 5.56327E-05 |
| REACTOME_HDMS_DEMETHYLATE_HISTONES | 48 | -0.740331629 | -1.642629603 | 4.53699E-06 | 0.000132271 | 0.000106628 |
| REACTOME_TELOMERE_MAINTENANCE | 112 | -0.654978923 | -1.502142273 | 5.08094E-06 | 0.000145334 | 0.000117159 |
| REACTOME_DNA_DOUBLE_STRAND_BREAK_RESPONSE | 77 | -0.690561532 | -1.563872864 | 5.84135E-06 | 0.00016399 | 0.000132199 |
| WP_EDA_SIGNALING_IN_HAIR_FOLLICLE_DEVELOPMENT | 13 | 0.764057318 | 2.737063883 | 8.45625E-06 | 0.000233085 | 0.000187899 |
| REACTOME_PROCESSING_OF_DNA_DOUBLE_STRAND_BREAK_ENDS | 96 | -0.659601455 | -1.504850786 | 8.68376E-06 | 0.000235082 | 0.000189508 |
| WP_HISTONE_MODIFICATIONS | 65 | -0.687088448 | -1.541227121 | 2.77854E-05 | 0.000738995 | 0.000595732 |
| REACTOME_CHROMOSOME_MAINTENANCE | 139 | -0.613346981 | -1.419216376 | 2.94664E-05 | 0.000770191 | 0.000620881 |
| REACTOME_TYPE_I_HEMIDESMOSOME_ASSEMBLY | 11 | 0.790108944 | 2.647060862 | 3.50435E-05 | 0.00090044 | 0.000725879 |
| REACTOME_APOPTOSIS_INDUCED_DNA_FRAGMENTATION | 13 | -0.874946798 | -1.729986755 | 3.6836E-05 | 0.000930724 | 0.000750292 |
| REACTOME_ESR_MEDIATED_SIGNALING | 218 | -0.57523247 | -1.350664564 | 3.78852E-05 | 0.00094154 | 0.000759011 |
| REACTOME_PKMTS_METHYLATE_HISTONE_LYSINES | 69 | -0.664907089 | -1.496511486 | 5.80958E-05 | 0.001420537 | 0.001145149 |
| WP_WNTBETACATENIN_SIGNALING_PATHWAY_IN_LEUKEMIA | 26 | 0.515565306 | 2.475496049 | 6.15966E-05 | 0.00148223 | 0.001194882 |
| REACTOME_REPRESSION_OF_WNT_TARGET_GENES | 14 | 0.676176317 | 2.448278355 | 6.28005E-05 | 0.001487586 | 0.001199199 |
| REACTOME_CHROMATIN_MODIFYING_ENZYMES | 271 | -0.548385413 | -1.295686683 | 8.29128E-05 | 0.001933782 | 0.001558895 |
| REACTOME_REGULATION_OF_GENE_EXPRESSION_IN_LATE_STAGE_BRANCHING_MORPHOGENESIS_PANCREATIC_BUD_PRECURSOR_CELLS | 16 | 0.623743193 | 2.394832104 | 0.000101438 | 0.002329992 | 0.001878295 |
| REACTOME_CLASS_C_3_METABOTROPIC_GLUTAMATE_PHEROMONE_RECEPTORS | 39 | -0.726048236 | -1.586617597 | 0.000110206 | 0.002493621 | 0.002010203 |
| REACTOME_FOXO_MEDIATED_TRANSCRIPTION_OF_CELL_DEATH_GENES | 16 | 0.617851095 | 2.372209679 | 0.000117164 | 0.00261207 | 0.002105689 |
| REACTOME_SEMA4D_IN_SEMAPHORIN_SIGNALING | 24 | 0.535895755 | 2.564902502 | 0.000127759 | 0.002766905 | 0.002230508 |
| BIOCARTA_ETS_PATHWAY | 17 | 0.606806326 | 2.477307531 | 0.000126862 | 0.002766905 | 0.002230508 |
| WP_GENE_REGULATORY_NETWORK_MODELLING_SOMITOGENESIS | 11 | 0.732089982 | 2.452682953 | 0.000178036 | 0.003801439 | 0.003064485 |
| REACTOME_SEMA3A_PLEXIN_REPULSION_SIGNALING_BY_INHIBITING_INTEGRIN_ADHESION | 14 | 0.650278678 | 2.354508982 | 0.000181575 | 0.003823163 | 0.003081997 |
| REACTOME_TRANSPORT_OF_CONNEXONS_TO_THE_PLASMA_MEMBRANE | 21 | 0.530243673 | 2.297670851 | 0.000212311 | 0.004409092 | 0.003554337 |
| WP_CONGENITAL_GENERALIZED_LIPODYSTROPHY | 18 | 0.588449847 | 2.476323479 | 0.000242335 | 0.004898402 | 0.003948788 |
| REACTOME_METALLOPROTEASE_DUBS | 36 | -0.721942395 | -1.571032159 | 0.00023972 | 0.004898402 | 0.003948788 |
| BIOCARTA_WNT_PATHWAY | 24 | 0.517040972 | 2.474659803 | 0.000253912 | 0.005020079 | 0.004046876 |
| BIOCARTA_ARAP_PATHWAY | 17 | 0.581498423 | 2.373987153 | 0.000254978 | 0.005020079 | 0.004046876 |
| BIOCARTA_PTDINS_PATHWAY | 23 | 0.522276519 | 2.427104761 | 0.000260646 | 0.005065884 | 0.004083801 |
| REACTOME_RUNX3_REGULATES_P14_ARF | 10 | 0.751862862 | 2.454342751 | 0.000272096 | 0.005210669 | 0.004200518 |
| REACTOME_POST_CHAPERONIN_TUBULIN_FOLDING_PATHWAY | 22 | 0.527255615 | 2.395033241 | 0.000274969 | 0.005210669 | 0.004200518 |
| PID_ARF_3PATHWAY | 19 | 0.567779147 | 2.480927364 | 0.000309331 | 0.005718847 | 0.00461018 |
| KEGG_CIRCADIAN_RHYTHM_MAMMAL | 13 | 0.645662454 | 2.312940849 | 0.000307921 | 0.005718847 | 0.00461018 |
| REACTOME_CYTOSOLIC_TRNA_AMINOACYLATION | 24 | 0.510256113 | 2.442186131 | 0.000354639 | 0.006477501 | 0.00522176 |
| BIOCARTA_PITX2_PATHWAY | 16 | 0.580215218 | 2.227708532 | 0.000358945 | 0.006478102 | 0.005222244 |
| BIOCARTA_NO2IL12_PATHWAY | 15 | 0.587164461 | 2.210960902 | 0.00038093 | 0.006793992 | 0.005476896 |
| REACTOME_G2_M_CHECKPOINTS | 166 | -0.575148601 | -1.338632106 | 0.000439743 | 0.007751748 | 0.006248979 |
| WP_TYPE_III_INTERFERON_SIGNALING | 10 | 0.727064695 | 2.373392881 | 0.000522972 | 0.009112934 | 0.007346283 |
| BIOCARTA_IL4_PATHWAY | 11 | 0.696693618 | 2.334096359 | 0.000531724 | 0.009160158 | 0.007384352 |
| REACTOME_PROCESSING_OF_INTRONLESS_PRE_MRNAS | 20 | 0.539251135 | 2.310437721 | 0.00054762 | 0.009215154 | 0.007428686 |
| BIOCARTA_RHO_PATHWAY | 21 | 0.494669842 | 2.143521053 | 0.000546831 | 0.009215154 | 0.007428686 |
| PID_P38_MK2_PATHWAY | 21 | 0.494260278 | 2.141746317 | 0.000553152 | 0.009215154 | 0.007428686 |
| KEGG_SELENOAMINO_ACID_METABOLISM | 26 | 0.454038771 | 2.180075292 | 0.000581887 | 0.009588491 | 0.007729648 |
| REACTOME_SEMA4D_INDUCED_CELL_MIGRATION_AND_GROWTH_CONE_COLLAPSE | 20 | 0.535837203 | 2.295810627 | 0.000623125 | 0.010157609 | 0.008188435 |
| WP_IMMUNE_RESPONSE_TO_TUBERCULOSIS | 23 | 0.490949733 | 2.281524044 | 0.000644398 | 0.010176123 | 0.00820336 |
| BIOCARTA_TNFR2_PATHWAY | 17 | 0.542055378 | 2.212959576 | 0.000634318 | 0.010176123 | 0.00820336 |
| REACTOME_BASIGIN_INTERACTIONS | 25 | 0.461885651 | 2.187030291 | 0.000643242 | 0.010176123 | 0.00820336 |
| REACTOME_FORMATION_OF_SENESCENCE_ASSOCIATED_HETEROCHROMATIN_FOCI_SAHF | 17 | -0.791259226 | -1.619172471 | 0.000747342 | 0.011680106 | 0.009415778 |
| REACTOME_ABORTIVE_ELONGATION_OF_HIV_1_TRANSCRIPT_IN_THE_ABSENCE_OF_TAT | 23 | 0.475337977 | 2.208973648 | 0.000866921 | 0.013142521 | 0.010594686 |
| REACTOME_NEGATIVE_REGULATION_OF_TCF_DEPENDENT_SIGNALING_BY_WNT_LIGAND_ANTAGONISTS | 14 | 0.598920009 | 2.168551095 | 0.000858338 | 0.013142521 | 0.010594686 |
| BIOCARTA_RELA_PATHWAY | 15 | 0.54559122 | 2.054417347 | 0.000864765 | 0.013142521 | 0.010594686 |
| WP_CANCER_IMMUNOTHERAPY_BY_PD1_BLOCKADE | 23 | 0.4745302 | 2.205219778 | 0.000876193 | 0.013151566 | 0.010601978 |
| BIOCARTA_RANMS_PATHWAY | 10 | 0.703440743 | 2.296276057 | 0.000991046 | 0.014729664 | 0.011874142 |
| REACTOME_TRANSCRIPTIONAL_REGULATION_BY_RUNX1 | 236 | -0.536429315 | -1.262365045 | 0.001095293 | 0.016121013 | 0.012995762 |
| BIOCARTA_VDR_PATHWAY | 24 | 0.477616634 | 2.285967167 | 0.001106831 | 0.016134185 | 0.013006381 |
| REACTOME_HOMOLOGY_DIRECTED_REPAIR | 137 | -0.575702754 | -1.331491564 | 0.00120574 | 0.017408594 | 0.01403373 |
| REACTOME_SIGNAL_ATTENUATION | 10 | 0.691038722 | 2.255791533 | 0.001315858 | 0.018819256 | 0.015170918 |
| BIOCARTA_NPC_PATHWAY | 11 | 0.654660149 | 2.193273817 | 0.001364437 | 0.019331653 | 0.015583981 |
| WP_AEROBIC_GLYCOLYSIS | 11 | 0.652420874 | 2.185771691 | 0.00144549 | 0.019921485 | 0.016059467 |
| REACTOME_FORMATION_OF_TUBULIN_FOLDING_INTERMEDIATES_BY_CCT_TRIC | 26 | 0.421597976 | 2.024310232 | 0.00143578 | 0.019921485 | 0.016059467 |
| REACTOME_SIGNALING_BY_NOTCH | 244 | -0.535064151 | -1.259751426 | 0.001426635 | 0.019921485 | 0.016059467 |
| PID_ARF6_DOWNSTREAM_PATHWAY | 15 | 0.516591561 | 1.945219472 | 0.001472382 | 0.019929747 | 0.016066127 |
| BIOCARTA_CD40_PATHWAY | 15 | 0.515144067 | 1.939768949 | 0.001472382 | 0.019929747 | 0.016066127 |
| REACTOME_INSULIN_RECEPTOR_RECYCLING | 26 | 0.420156982 | 2.017391271 | 0.001562837 | 0.020782987 | 0.016753956 |
| REACTOME_POLYMERASE_SWITCHING_ON_THE_C_STRAND_OF_THE_TELOMERE | 26 | 0.419298437 | 2.013268955 | 0.001562837 | 0.020782987 | 0.016753956 |
| WP_TRANSCRIPTIONAL_CASCADE_REGULATING_ADIPOGENESIS | 13 | 0.57839255 | 2.071961515 | 0.001579103 | 0.020816693 | 0.016781128 |
| REACTOME_ACYL_CHAIN_REMODELLING_OF_PI | 17 | 0.501755219 | 2.048432805 | 0.001664845 | 0.0217578 | 0.01753979 |
| WP_NANOPARTICLE_TRIGGERED_AUTOPHAGIC_CELL_DEATH | 23 | 0.455549648 | 2.117014035 | 0.001742404 | 0.022197346 | 0.017894125 |
| WP_47_HEDGEHOG_SIGNALING_PATHWAY | 16 | 0.520855526 | 1.999799836 | 0.001732288 | 0.022197346 | 0.017894125 |
| REACTOME_RESPONSE_OF_EIF2AK1_HRI_TO_HEME_DEFICIENCY | 15 | 0.504562861 | 1.899925543 | 0.001738071 | 0.022197346 | 0.017894125 |
| PID_BETA_CATENIN_DEG_PATHWAY | 18 | 0.518310877 | 2.18116361 | 0.00176224 | 0.022262971 | 0.017947027 |
| REACTOME_TRAF3_DEPENDENT_IRF_ACTIVATION_PATHWAY | 15 | 0.498859577 | 1.878449893 | 0.001870915 | 0.023440558 | 0.018896325 |
| REACTOME_ACETYLCHOLINE_NEUROTRANSMITTER_RELEASE_CYCLE | 17 | 0.496182362 | 2.025681425 | 0.001925423 | 0.023779994 | 0.019169958 |
| REACTOME_RESOLUTION_OF_AP_SITES_VIA_THE_MULTIPLE_NUCLEOTIDE_PATCH_REPLACEMENT_PATHWAY | 25 | 0.424668761 | 2.010808178 | 0.001945065 | 0.023779994 | 0.019169958 |
| WP_NUCLEOTIDE_EXCISION_REPAIR_IN_XERODERMA_PIGMENTOSUM | 75 | -0.609105087 | -1.375751943 | 0.001942421 | 0.023779994 | 0.019169958 |
| REACTOME_CRMPS_IN_SEMA3A_SIGNALING | 16 | 0.513334385 | 1.970922777 | 0.002014582 | 0.024432851 | 0.019696251 |
| REACTOME_SEROTONIN_NEUROTRANSMITTER_RELEASE_CYCLE | 18 | 0.511659919 | 2.153174951 | 0.002104413 | 0.024924143 | 0.0200923 |
| REACTOME_FORMATION_OF_APOPTOSOME | 11 | 0.632076245 | 2.117612137 | 0.002093919 | 0.024924143 | 0.0200923 |
| WP_DNA_MISMATCH_REPAIR | 23 | 0.447885822 | 2.081398978 | 0.002078755 | 0.024924143 | 0.0200923 |
| REACTOME_SUMOYLATION_OF_CHROMATIN_ORGANIZATION_PROTEINS | 71 | -0.617717615 | -1.392735353 | 0.002164406 | 0.025435966 | 0.0205049 |
| WP_LEPTININSULIN_SIGNALING_OVERLAP | 17 | 0.487140069 | 1.988765953 | 0.002186002 | 0.025492147 | 0.020550189 |
| REACTOME_ACYL_CHAIN_REMODELLING_OF_PS | 22 | 0.469431795 | 2.132371321 | 0.002202935 | 0.025493506 | 0.020551285 |
| REACTOME_SEMA3A_PAK_DEPENDENT_AXON_REPULSION | 16 | 0.508522199 | 1.952446618 | 0.002296877 | 0.02637928 | 0.021265341 |
| REACTOME_EARLY_PHASE_OF_HIV_LIFE_CYCLE | 14 | 0.562650208 | 2.037226518 | 0.002416651 | 0.027546187 | 0.022206029 |
| REACTOME_TRANSCRIPTION_OF_E2F_TARGETS_UNDER_NEGATIVE_CONTROL_BY_DREAM_COMPLEX | 19 | 0.495643386 | 2.165728075 | 0.002472551 | 0.027561672 | 0.022218512 |
| REACTOME_P38MAPK_EVENTS | 13 | 0.558250751 | 1.999808041 | 0.00246458 | 0.027561672 | 0.022218512 |
| WP_H19_ACTION_RBE2F1_SIGNALING_AND_CDKBETACATENIN_ACTIVITY | 15 | 0.486494606 | 1.831889741 | 0.002469807 | 0.027561672 | 0.022218512 |
| KEGG_TASTE_TRANSDUCTION | 51 | -0.639437473 | -1.422109136 | 0.002539456 | 0.028100837 | 0.022653153 |
| REACTOME_RIP_MEDIATED_NFKB_ACTIVATION_VIA_ZBP1 | 17 | 0.475907541 | 1.942908775 | 0.002649255 | 0.028894029 | 0.023292575 |
| REACTOME_MATURATION_OF_NUCLEOPROTEIN | 15 | 0.482425236 | 1.816566574 | 0.002647807 | 0.028894029 | 0.023292575 |
| REACTOME_ZBP1_DAI_MEDIATED_INDUCTION_OF_TYPE_I_IFNS | 21 | 0.442642033 | 1.918072293 | 0.00289999 | 0.031334005 | 0.025259533 |
| REACTOME_POLO_LIKE_KINASE_MEDIATED_EVENTS | 16 | 0.495602775 | 1.90284311 | 0.00291431 | 0.031334005 | 0.025259533 |
| REACTOME_SARS_COV_2_MODULATES_AUTOPHAGY | 11 | 0.616537863 | 2.065554706 | 0.003013861 | 0.032176154 | 0.025938421 |
| REACTOME_SUMOYLATION_OF_IMMUNE_RESPONSE_PROTEINS | 11 | 0.614056686 | 2.057242149 | 0.003068164 | 0.032526826 | 0.026221112 |
| WP_IL9_SIGNALING_PATHWAY | 17 | 0.464158355 | 1.894942325 | 0.003171556 | 0.033389435 | 0.026916494 |
| WP_BIOSYNTHESIS_AND_REGENERATION_OF_TETRAHYDROBIOPTERIN_AND_CATABOLISM_OF_PHENYLALANINE | 10 | 0.649232351 | 2.11932095 | 0.003421122 | 0.035343503 | 0.028491742 |
| WP_ROLES_OF_CERAMIDES_IN_THE_DEVELOPMENT_OF_INSULIN_RESISTANCE | 23 | 0.427094817 | 1.98477976 | 0.003427107 | 0.035343503 | 0.028491742 |
| REACTOME_DEPOLYMERISATION_OF_THE_NUCLEAR_LAMINA | 15 | 0.469042742 | 1.766174952 | 0.003404307 | 0.035343503 | 0.028491742 |
| BIOCARTA_EPO_PATHWAY | 19 | 0.481517932 | 2.104006498 | 0.003523853 | 0.036095688 | 0.029098107 |
| REACTOME_TCF_DEPENDENT_SIGNALING_IN_RESPONSE_TO_WNT | 230 | -0.523732643 | -1.231621654 | 0.003978387 | 0.040478085 | 0.032630924 |
| WP_PATHWAYS_OF_NUCLEIC_ACID_METABOLISM_AND_INNATE_IMMUNE_SENSING | 15 | 0.465082616 | 1.751263145 | 0.004027309 | 0.040702673 | 0.032811973 |
| REACTOME_P75NTR_SIGNALS_VIA_NF_KB | 16 | 0.47538156 | 1.825204726 | 0.00410064 | 0.041169344 | 0.033188174 |
| BIOCARTA_CPSF_PATHWAY | 10 | 0.632195522 | 2.063706793 | 0.004343113 | 0.042754282 | 0.034465853 |
| BIOCARTA_TCRA_PATHWAY | 12 | 0.574904074 | 2.003043055 | 0.004342796 | 0.042754282 | 0.034465853 |
| REACTOME_RESPONSE_OF_MTB_TO_PHAGOCYTOSIS | 23 | 0.419047329 | 1.947381763 | 0.004328597 | 0.042754282 | 0.034465853 |
| REACTOME_PCNA_DEPENDENT_LONG_PATCH_BASE_EXCISION_REPAIR | 21 | 0.424622361 | 1.839988802 | 0.004542427 | 0.044143072 | 0.035585409 |
| PID_S1P_META_PATHWAY | 21 | 0.424458466 | 1.83927861 | 0.004542427 | 0.044143072 | 0.035585409 |
| BIOCARTA_PRC2_PATHWAY | 14 | 0.53170745 | 1.925189936 | 0.004688229 | 0.045269776 | 0.036493688 |
| REACTOME_RHO_GTPASES_ACTIVATE_KTN1 | 11 | 0.590302826 | 1.977660828 | 0.004805848 | 0.045535406 | 0.036707823 |
| REACTOME_TP53_REGULATES_TRANSCRIPTION_OF_GENES_INVOLVED_IN_G2_CELL_CYCLE_ARREST | 18 | 0.469081176 | 1.973994443 | 0.004779792 | 0.045535406 | 0.036707823 |
| REACTOME_SIGNALING_BY_NUCLEAR_RECEPTORS | 294 | -0.508507735 | -1.2049708 | 0.004796351 | 0.045535406 | 0.036707823 |
| REACTOME_TNFR1_INDUCED_PROAPOPTOTIC_SIGNALING | 13 | 0.531337903 | 1.903398802 | 0.005024773 | 0.047314016 | 0.038141628 |
| REACTOME_SIGNALLING_TO_RAS | 20 | 0.460826493 | 1.974424984 | 0.005153778 | 0.047921035 | 0.038630969 |
| PID_MYC_PATHWAY | 25 | 0.392678596 | 1.859334625 | 0.005128453 | 0.047921035 | 0.038630969 |
| PID_RXR_VDR_PATHWAY | 26 | 0.384447648 | 1.845932266 | 0.00518407 | 0.047921035 | 0.038630969 |
| REACTOME_ACYL_CHAIN_REMODELLING_OF_PG | 18 | 0.462593763 | 1.946694014 | 0.005329975 | 0.048759157 | 0.039306611 |
| WP_TCA_CYCLE_AND_DEFICIENCY_OF_PYRUVATE_DEHYDROGENASE_COMPLEX_PDHC | 16 | 0.467553395 | 1.795148859 | 0.005339063 | 0.048759157 | 0.039306611 |
| REACTOME_DOPAMINE_NEUROTRANSMITTER_RELEASE_CYCLE | 23 | 0.411740442 | 1.913425461 | 0.005533049 | 0.05004965 | 0.040346927 |
| WP_INTERACTOME_OF_POLYCOMB_REPRESSIVE_COMPLEX_2_PRC2 | 16 | 0.465068007 | 1.78560633 | 0.005546399 | 0.05004965 | 0.040346927 |
| REACTOME_OTHER_INTERLEUKIN_SIGNALING | 24 | 0.424294227 | 2.030755637 | 0.005598941 | 0.050224818 | 0.040488137 |
| SA_TRKA_RECEPTOR | 17 | 0.441309863 | 1.801662574 | 0.005790215 | 0.051635092 | 0.041625012 |
| REACTOME_SIGNALING_BY_CTNNB1_PHOSPHO_SITE_MUTANTS | 15 | 0.439765124 | 1.655930422 | 0.00594784 | 0.052730556 | 0.042508107 |
| REACTOME_NEF_MEDIATES_DOWN_MODULATION_OF_CELL_SURFACE_RECEPTORS_BY_RECRUITING_THEM_TO_CLATHRIN_ADAPTERS | 21 | 0.41412377 | 1.794495935 | 0.006034938 | 0.053191667 | 0.042879826 |
| REACTOME_BETA_CATENIN_PHOSPHORYLATION_CASCADE | 17 | 0.439789146 | 1.795454196 | 0.006257476 | 0.054834299 | 0.044204014 |
| REACTOME_NF_KB_ACTIVATION_THROUGH_FADD_RIP_1_PATHWAY_MEDIATED_BY_CASPASE_8_AND_10 | 13 | 0.51511593 | 1.845287223 | 0.006378947 | 0.055577496 | 0.044803133 |
| PID_P38_MKK3_6PATHWAY | 26 | 0.376253583 | 1.806588315 | 0.006415892 | 0.055579952 | 0.044805113 |
| REACTOME_WNT5A_DEPENDENT_INTERNALIZATION_OF_FZD4 | 15 | 0.432674601 | 1.629231144 | 0.006484477 | 0.055854929 | 0.045026783 |
| REACTOME_MITOTIC_TELOPHASE_CYTOKINESIS | 13 | 0.513832373 | 1.840689169 | 0.006592765 | 0.056466843 | 0.04552007 |
| PID_WNT_CANONICAL_PATHWAY | 20 | 0.455213216 | 1.950374728 | 0.006761339 | 0.057585337 | 0.04642173 |
| REACTOME_ATF6_ATF6_ALPHA_ACTIVATES_CHAPERONES | 11 | 0.575684754 | 1.928686661 | 0.006821477 | 0.057772952 | 0.046572974 |
| BIOCARTA_CERAMIDE_PATHWAY | 21 | 0.405829168 | 1.758553466 | 0.006963369 | 0.058647045 | 0.047277614 |
| REACTOME_CYTOSOLIC_IRON_SULFUR_CLUSTER_ASSEMBLY | 13 | 0.509852559 | 1.826432379 | 0.007020399 | 0.058800693 | 0.047401475 |
| REACTOME_INSERTION_OF_TAIL_ANCHORED_PROTEINS_INTO_THE_ENDOPLASMIC_RETICULUM_MEMBRANE | 22 | 0.427303062 | 1.941003582 | 0.007465612 | 0.062186088 | 0.050130571 |
| BIOCARTA_PROTEASOME_PATHWAY | 19 | 0.450383764 | 1.967964853 | 0.007630323 | 0.062328743 | 0.050245571 |
| WP_PROSURVIVAL_SIGNALING_OF_NEUROPROTECTIN_D1 | 15 | 0.424743957 | 1.599368397 | 0.007557754 | 0.062328743 | 0.050245571 |
| REACTOME_MISMATCH_REPAIR | 15 | 0.424552779 | 1.598648516 | 0.007647194 | 0.062328743 | 0.050245571 |
| REACTOME_PROCESSIVE_SYNTHESIS_ON_THE_LAGGING_STRAND | 15 | 0.424552779 | 1.598648516 | 0.007647194 | 0.062328743 | 0.050245571 |
| REACTOME_STING_MEDIATED_INDUCTION_OF_HOST_IMMUNE_RESPONSES | 15 | 0.424507872 | 1.598479419 | 0.007736634 | 0.062386899 | 0.050292452 |
| REACTOME_SENSORY_PERCEPTION_OF_TASTE | 47 | -0.635452494 | -1.40957813 | 0.007712566 | 0.062386899 | 0.050292452 |
| WP_HIPPOYAP_SIGNALING_PATHWAY | 22 | 0.426190997 | 1.935952078 | 0.007943401 | 0.063715326 | 0.051363347 |
| REACTOME_REGULATION_OF_NF_KAPPA_B_SIGNALING | 18 | 0.448844359 | 1.888833569 | 0.008362769 | 0.06672609 | 0.053790439 |
| PID_S1P_S1P2_PATHWAY | 24 | 0.405862427 | 1.942537415 | 0.008515979 | 0.067240752 | 0.054205328 |
| WP_NICOTINE_EFFECT_ON_DOPAMINERGIC_NEURONS | 21 | 0.397686383 | 1.723268862 | 0.008510759 | 0.067240752 | 0.054205328 |
| REACTOME_PROCESSING_AND_ACTIVATION_OF_SUMO | 10 | 0.596941562 | 1.948625567 | 0.008826651 | 0.069332658 | 0.055891693 |
| REACTOME_TELOMERE_EXTENSION_BY_TELOMERASE | 23 | 0.397656186 | 1.847973608 | 0.009153842 | 0.071426973 | 0.05758 |
| REACTOME_SYNTHESIS_OF_IP3_AND_IP4_IN_THE_CYTOSOL | 26 | 0.36610475 | 1.757858513 | 0.009187506 | 0.071426973 | 0.05758 |
| BIOCARTA_IL3_PATHWAY | 15 | 0.417613375 | 1.572518272 | 0.009617517 | 0.074388548 | 0.059967438 |
| REACTOME_E3_UBIQUITIN_LIGASES_UBIQUITINATE_TARGET_PROTEINS | 59 | -0.608688063 | -1.363047796 | 0.010098528 | 0.077320042 | 0.062330627 |
| REACTOME_DNA_DOUBLE_STRAND_BREAK_REPAIR | 167 | -0.532696146 | -1.24024516 | 0.010088439 | 0.077320042 | 0.062330627 |
| WP_ACQUIRED_PARTIAL_LIPODYSTROPHY_BARRAQUERSIMONS_SYNDROME | 10 | 0.588203168 | 1.920100399 | 0.01029154 | 0.077621764 | 0.062573856 |
| BIOCARTA_SM_PATHWAY | 14 | 0.490960236 | 1.77765368 | 0.010271635 | 0.077621764 | 0.062573856 |
| REACTOME_NF_KB_IS_ACTIVATED_AND_SIGNALS_SURVIVAL | 13 | 0.493907291 | 1.769312033 | 0.010242421 | 0.077621764 | 0.062573856 |
| REACTOME_MRNA_DECAY_BY_3_TO_5_EXORIBONUCLEASE | 16 | 0.437892609 | 1.681267694 | 0.010522497 | 0.078970821 | 0.063661383 |
| REACTOME_EPHRIN_SIGNALING | 19 | 0.437441123 | 1.911411608 | 0.010617284 | 0.07928967 | 0.063918419 |
| REACTOME_CTLA4_INHIBITORY_SIGNALING | 21 | 0.386844765 | 1.676289573 | 0.010678127 | 0.079353138 | 0.063969583 |
| KEGG_PHENYLALANINE_METABOLISM | 18 | 0.439248823 | 1.848453488 | 0.01098904 | 0.080870799 | 0.065193027 |
| PID_CIRCADIAN_PATHWAY | 16 | 0.436277822 | 1.675067794 | 0.010939216 | 0.080870799 | 0.065193027 |
| REACTOME_GLUTAMATE_AND_GLUTAMINE_METABOLISM | 14 | 0.483285995 | 1.749867025 | 0.011120512 | 0.081442977 | 0.065654281 |
| REACTOME_TRANSLATION_OF_REPLICASE_AND_ASSEMBLY_OF_THE_REPLICATION_TRANSCRIPTION_COMPLEX | 14 | 0.4812104 | 1.742351774 | 0.011290288 | 0.081966526 | 0.066076334 |
| REACTOME_REGULATION_OF_FZD_BY_UBIQUITINATION | 21 | 0.382091835 | 1.655694009 | 0.011300134 | 0.081966526 | 0.066076334 |
| REACTOME_APOPTOTIC_CLEAVAGE_OF_CELL_ADHESION_PROTEINS | 11 | 0.541553718 | 1.81433923 | 0.011516723 | 0.082355436 | 0.06638985 |
| WP_SARSCOV2_MITOCHONDRIAL_CHRONIC_OXIDATIVE_STRESS_AND_ENDOTHELIAL_DYSFUNCTION | 26 | 0.360648255 | 1.731659053 | 0.011450924 | 0.082355436 | 0.06638985 |
| REACTOME_SIGNAL_TRANSDUCTION_BY_L1 | 21 | 0.379232881 | 1.643305486 | 0.011507471 | 0.082355436 | 0.06638985 |
| BIOCARTA_CTL_PATHWAY | 13 | 0.488827718 | 1.751115603 | 0.011674906 | 0.083094634 | 0.066985745 |
| REACTOME_ERYTHROPOIETIN_ACTIVATES_RAS | 14 | 0.480571145 | 1.740037181 | 0.011799614 | 0.083201002 | 0.067071492 |
| REACTOME_REGULATION_OF_IFNG_SIGNALING | 14 | 0.479790256 | 1.737209759 | 0.011799614 | 0.083201002 | 0.067071492 |
| SA_G1_AND_S_PHASES | 15 | 0.410365441 | 1.545226263 | 0.011954422 | 0.083515686 | 0.067325171 |
| WP_FBXL10_ENHANCEMENT_OF_MAPERK_SIGNALING_IN_DIFFUSE_LARGE_BCELL_LYMPHOMA | 33 | -0.654099354 | -1.41507707 | 0.011953559 | 0.083515686 | 0.067325171 |
| REACTOME_NOTCH3_ACTIVATION_AND_TRANSMISSION_OF_SIGNAL_TO_THE_NUCLEUS | 25 | 0.366971725 | 1.737612496 | 0.012198802 | 0.08418925 | 0.067868156 |
| WP_EFFECT_OF_PROGERIN_ON_GENES_INVOLVED_IN_HUTCHINSONGILFORD_PROGERIA_SYNDROME | 35 | -0.643697204 | -1.397669659 | 0.012217437 | 0.08418925 | 0.067868156 |
| REACTOME_RNA_POLYMERASE_II_TRANSCRIBES_SNRNA_GENES | 80 | -0.577275585 | -1.309675099 | 0.012180822 | 0.08418925 | 0.067868156 |
| BIOCARTA_MTA3_PATHWAY | 18 | 0.432591529 | 1.820438166 | 0.012371292 | 0.084481435 | 0.068103698 |
| REACTOME_ACTIVATED_TAK1_MEDIATES_P38_MAPK_ACTIVATION | 23 | 0.382112711 | 1.775740525 | 0.012331146 | 0.084481435 | 0.068103698 |
| PID_INTEGRIN_CS_PATHWAY | 26 | 0.35710082 | 1.71462598 | 0.012482512 | 0.084858694 | 0.068407821 |
| REACTOME_PINK1_PRKN_MEDIATED_MITOPHAGY | 21 | 0.377557431 | 1.636045367 | 0.012544153 | 0.084897034 | 0.068438729 |
| BIOCARTA_STRESS_PATHWAY | 24 | 0.388351636 | 1.858727326 | 0.012766177 | 0.086015666 | 0.0693405 |
| REACTOME_PTK6_REGULATES_RHO_GTPASES_RAS_GTPASE_AND_MAP_KINASES | 14 | 0.472094204 | 1.709344134 | 0.013497373 | 0.090539902 | 0.072987659 |
| BIOCARTA_TCYTOTOXIC_PATHWAY | 12 | 0.518687556 | 1.807177151 | 0.013756948 | 0.091874593 | 0.074063604 |
| KEGG_ALPHA_LINOLENIC_ACID_METABOLISM | 19 | 0.424429571 | 1.854557258 | 0.014077677 | 0.093604203 | 0.075457908 |
| REACTOME_GOLGI_CISTERNAE_PERICENTRIOLAR_STACK_REORGANIZATION | 14 | 0.469029932 | 1.698249112 | 0.014346254 | 0.094973453 | 0.076561713 |
| REACTOME_NOREPINEPHRINE_NEUROTRANSMITTER_RELEASE_CYCLE | 18 | 0.424746797 | 1.787425844 | 0.014585622 | 0.095143941 | 0.076699149 |
| REACTOME_POLYMERASE_SWITCHING | 14 | 0.468347171 | 1.69577699 | 0.014685806 | 0.095143941 | 0.076699149 |
| REACTOME_TP53_REGULATES_TRANSCRIPTION_OF_SEVERAL_ADDITIONAL_CELL_DEATH_GENES_WHOSE_SPECIFIC_ROLES_IN_P53_DEPENDENT_APOPTOSIS_REMAIN_UNCERTAIN | 14 | 0.468074066 | 1.694788141 | 0.014685806 | 0.095143941 | 0.076699149 |
| BIOCARTA_PS1_PATHWAY | 14 | 0.468032269 | 1.694636804 | 0.014685806 | 0.095143941 | 0.076699149 |
| REACTOME_RUNX3_REGULATES_NOTCH_SIGNALING | 14 | 0.467921185 | 1.694234595 | 0.014685806 | 0.095143941 | 0.076699149 |
| BIOCARTA_IL2_PATHWAY | 22 | 0.393721784 | 1.788462244 | 0.014764883 | 0.0952492 | 0.076784003 |
| REACTOME_WNT_LIGAND_BIOGENESIS_AND_TRAFFICKING | 26 | 0.353617624 | 1.697901356 | 0.014958331 | 0.095682826 | 0.077133565 |
| REACTOME_TRANSCRIPTION_OF_E2F_TARGETS_UNDER_NEGATIVE_CONTROL_BY_P107_RBL1_AND_P130_RBL2_IN_COMPLEX_WITH_HDAC1 | 16 | 0.420713388 | 1.615308898 | 0.014898067 | 0.095682826 | 0.077133565 |
| PID_INTEGRIN4_PATHWAY | 11 | 0.521880268 | 1.748428295 | 0.015026488 | 0.095714941 | 0.077159455 |
| REACTOME_LAGGING_STRAND_SYNTHESIS | 20 | 0.424610762 | 1.819257592 | 0.015299989 | 0.097049305 | 0.078235136 |
| BIOCARTA_HES_PATHWAY | 12 | 0.515037099 | 1.794458469 | 0.015776263 | 0.099653395 | 0.080334392 |
| REACTOME_CARNITINE_METABOLISM | 14 | 0.460031797 | 1.665668943 | 0.016553346 | 0.1041281 | 0.083941622 |
| WP_PHOTODYNAMIC_THERAPYINDUCED_NFE2L2_NRF2_SURVIVAL_SIGNALING | 23 | 0.372988773 | 1.733340086 | 0.017181717 | 0.107634226 | 0.086768043 |
| REACTOME_REGULATION_OF_SIGNALING_BY_CBL | 22 | 0.382102273 | 1.735681174 | 0.017645777 | 0.109635237 | 0.088381135 |
| BIOCARTA_RACCYCD_PATHWAY | 26 | 0.347339089 | 1.667754854 | 0.017640475 | 0.109635237 | 0.088381135 |
| WP_DEGRADATION_PATHWAY_OF_SPHINGOLIPIDS_INCLUDING_DISEASES | 15 | 0.394537758 | 1.485627306 | 0.018066362 | 0.111790222 | 0.09011835 |
| REACTOME_PASSIVE_TRANSPORT_BY_AQUAPORINS | 13 | 0.466966526 | 1.67280279 | 0.018570622 | 0.114205882 | 0.092065706 |
| WP_REGULATION_OF_SISTER_CHROMATID_SEPARATION_AT_THE_METAPHASEANAPHASE_TRANSITION | 15 | 0.391852772 | 1.475517025 | 0.018607423 | 0.114205882 | 0.092065706 |
| REACTOME_GASTRIN_CREB_SIGNALLING_PATHWAY_VIA_PKC_AND_MAPK | 18 | 0.415541203 | 1.748686725 | 0.018752831 | 0.114634238 | 0.09241102 |
| PID_PRL_SIGNALING_EVENTS_PATHWAY | 23 | 0.367115579 | 1.706046391 | 0.019006279 | 0.115716941 | 0.093283827 |
| REACTOME_SUMOYLATION_OF_DNA_METHYLATION_PROTEINS | 16 | 0.413000318 | 1.585694935 | 0.019482022 | 0.118138981 | 0.095236326 |
| KEGG_LIMONENE_AND_PINENE_DEGRADATION | 10 | 0.546968869 | 1.78549726 | 0.019896757 | 0.119214766 | 0.096103558 |
| REACTOME_SIGNALING_BY_ERYTHROPOIETIN | 25 | 0.348194547 | 1.648702485 | 0.019956681 | 0.119214766 | 0.096103558 |
| KEGG_TERPENOID_BACKBONE_BIOSYNTHESIS | 15 | 0.384241431 | 1.446856608 | 0.020052616 | 0.119214766 | 0.096103558 |
| REACTOME_DISEASES_ASSOCIATED_WITH_GLYCOSYLATION_PRECURSOR_BIOSYNTHESIS | 15 | 0.382520825 | 1.440377686 | 0.020052616 | 0.119214766 | 0.096103558 |
| REACTOME_NEGATIVE_REGULATION_OF_FLT3 | 15 | 0.382029223 | 1.438526565 | 0.020052616 | 0.119214766 | 0.096103558 |
| BIOCARTA_MAL_PATHWAY | 19 | 0.405806998 | 1.773185386 | 0.020391027 | 0.120283254 | 0.096964906 |
| REACTOME_VEGFR2_MEDIATED_CELL_PROLIFERATION | 19 | 0.404527079 | 1.767592742 | 0.020391027 | 0.120283254 | 0.096964906 |
| REACTOME_PROLONGED_ERK_ACTIVATION_EVENTS | 14 | 0.449257155 | 1.626656452 | 0.020644716 | 0.12083934 | 0.097413188 |
| PID_NFKAPPAB_ATYPICAL_PATHWAY | 17 | 0.395184779 | 1.613355347 | 0.020569268 | 0.12083934 | 0.097413188 |
| REACTOME_ACTIVATION_OF_BAD_AND_TRANSLOCATION_TO_MITOCHONDRIA | 15 | 0.380499795 | 1.432767522 | 0.021136512 | 0.123242126 | 0.099350165 |
| BIOCARTA_SPRY_PATHWAY | 17 | 0.392046541 | 1.600543381 | 0.021274492 | 0.123571381 | 0.09961559 |
| REACTOME_TRAF6_MEDIATED_IRF7_ACTIVATION_IN_TLR7_8_OR_9_SIGNALING | 13 | 0.460005664 | 1.647867062 | 0.022025557 | 0.12744559 | 0.102738738 |
| REACTOME_PHASE_2_PLATEAU_PHASE | 15 | 0.377304877 | 1.420737096 | 0.02222041 | 0.12808419 | 0.103253537 |
| REACTOME_SIGNALING_BY_CYTOSOLIC_FGFR1_FUSION_MUTANTS | 18 | 0.403774719 | 1.699170831 | 0.022920057 | 0.131120024 | 0.105700838 |
| KEGG_SULFUR_METABOLISM | 13 | 0.458877505 | 1.643825685 | 0.022889292 | 0.131120024 | 0.105700838 |
| BIOCARTA_CDMAC_PATHWAY | 16 | 0.404953724 | 1.55480042 | 0.023242805 | 0.13246651 | 0.106786293 |
| REACTOME_LGI_ADAM_INTERACTIONS | 14 | 0.436640254 | 1.580973563 | 0.023715765 | 0.134655805 | 0.108551166 |
| BIOCARTA_PML_PATHWAY | 17 | 0.38650603 | 1.577924056 | 0.023860317 | 0.134971049 | 0.108805296 |
| REACTOME_SLBP_DEPENDENT_PROCESSING_OF_REPLICATION_DEPENDENT_HISTONE_PRE_MRNAS | 11 | 0.490920014 | 1.644703767 | 0.02402896 | 0.135419718 | 0.109166985 |
| REACTOME_REGULATION_OF_INNATE_IMMUNE_RESPONSES_TO_CYTOSOLIC_DNA | 14 | 0.434120497 | 1.571850104 | 0.024398222 | 0.136991496 | 0.110434056 |
| REACTOME_NEUROTOXICITY_OF_CLOSTRIDIUM_TOXINS | 10 | 0.536701594 | 1.751981291 | 0.02462456 | 0.137245707 | 0.110638985 |
| REACTOME_P75NTR_RECRUITS_SIGNALLING_COMPLEXES | 13 | 0.45391765 | 1.62605812 | 0.024616764 | 0.137245707 | 0.110638985 |
| BIOCARTA_PCAF_PATHWAY | 13 | 0.452019187 | 1.619257302 | 0.025192588 | 0.138987956 | 0.112043478 |
| WP_FOXA2_PATHWAY | 21 | 0.35702159 | 1.547058725 | 0.025212195 | 0.138987956 | 0.112043478 |
| BIOCARTA_TALL1_PATHWAY | 15 | 0.369356821 | 1.390808783 | 0.02511081 | 0.138987956 | 0.112043478 |
| REACTOME_GLYCOGEN_BREAKDOWN_GLYCOGENOLYSIS | 14 | 0.432734324 | 1.566831093 | 0.025421907 | 0.139132169 | 0.112159733 |
| WP_ID_SIGNALING_PATHWAY | 16 | 0.400792615 | 1.538824042 | 0.025336697 | 0.139132169 | 0.112159733 |
| WP_EPO_RECEPTOR_SIGNALING | 26 | 0.332568663 | 1.59683439 | 0.025917653 | 0.139826197 | 0.112719216 |
| BIOCARTA_PDZS_PATHWAY | 17 | 0.383276646 | 1.564739987 | 0.025750184 | 0.139826197 | 0.112719216 |
| WP_BIOGENIC_AMINE_SYNTHESIS | 15 | 0.366995727 | 1.38191811 | 0.025833411 | 0.139826197 | 0.112719216 |
| REACTOME_SIGNALING_BY_NOTCH1_HD_DOMAIN_MUTANTS_IN_CANCER | 15 | 0.366871501 | 1.381450339 | 0.025833411 | 0.139826197 | 0.112719216 |
| BIOCARTA_IL12_PATHWAY | 19 | 0.395864758 | 1.729742484 | 0.026081444 | 0.140210884 | 0.113029326 |
| REACTOME_ERKS_ARE_INACTIVATED | 13 | 0.446129916 | 1.598160309 | 0.026344237 | 0.140626281 | 0.113364194 |
| PID_INSULIN_GLUCOSE_PATHWAY | 26 | 0.330561205 | 1.587195546 | 0.026332326 | 0.140626281 | 0.113364194 |
| BIOCARTA_EIF2_PATHWAY | 10 | 0.534571273 | 1.745027178 | 0.026594484 | 0.141169017 | 0.113801714 |
| REACTOME_SUPPRESSION_OF_PHAGOSOMAL_MATURATION | 13 | 0.445797587 | 1.596969815 | 0.02663215 | 0.141169017 | 0.113801714 |
| WP_NSP1_FROM_SARSCOV2_INHIBITS_TRANSLATION_INITIATION_IN_THE_HOST_CELL | 16 | 0.396487682 | 1.52229546 | 0.027011813 | 0.142682609 | 0.115021878 |
| PID_EPHA2_FWD_PATHWAY | 19 | 0.389463837 | 1.701773474 | 0.027345984 | 0.14394622 | 0.116040523 |
| REACTOME_TNF_RECEPTOR_SUPERFAMILY_TNFSF_MEMBERS_MEDIATING_NON_CANONICAL_NF_KB_PATHWAY | 17 | 0.379455385 | 1.549139557 | 0.027640055 | 0.144990736 | 0.116882547 |
| REACTOME_APC_C_CDC20_MEDIATED_DEGRADATION_OF_CYCLIN_B | 24 | 0.361388843 | 1.729678095 | 0.027939147 | 0.145822645 | 0.11755318 |
| PID_VEGFR1_PATHWAY | 26 | 0.326658289 | 1.568455623 | 0.027991022 | 0.145822645 | 0.11755318 |
| WP_CELLTYPE_DEPENDENT_SELECTIVITY_OF_CCK2R_SIGNALING | 13 | 0.443151504 | 1.587490818 | 0.028359624 | 0.147236953 | 0.118693308 |
| WP_DIFFERENTIATION_OF_WHITE_AND_BROWN_ADIPOCYTE | 25 | 0.330059338 | 1.562832203 | 0.028699384 | 0.148492377 | 0.119705353 |
| PID_S1P_S1P4_PATHWAY | 14 | 0.424377321 | 1.536572316 | 0.028834195 | 0.148682448 | 0.119858577 |
| PID_ECADHERIN_KERATINOCYTE_PATHWAY | 21 | 0.353913516 | 1.533590708 | 0.02896269 | 0.148838772 | 0.119984596 |
| REACTOME_OTHER_SEMAPHORIN_INTERACTIONS | 19 | 0.386664541 | 1.689541867 | 0.029875065 | 0.15300878 | 0.123346197 |
| BIOCARTA_ACTINY_PATHWAY | 12 | 0.479736741 | 1.67146728 | 0.03018637 | 0.153928942 | 0.124087975 |
| BIOCARTA_CELLCYCLE_PATHWAY | 23 | 0.347310624 | 1.614009511 | 0.0302578 | 0.153928942 | 0.124087975 |
| BIOCARTA_MCM_PATHWAY | 18 | 0.387645038 | 1.631293669 | 0.030432036 | 0.154297545 | 0.12438512 |
| REACTOME_INHIBITION_OF_REPLICATION_INITIATION_OF_DAMAGED_DNA_BY_RB1_E2F1 | 13 | 0.439741104 | 1.575273824 | 0.030959348 | 0.156447905 | 0.126118607 |
| REACTOME_SIGNALING_BY_LEPTIN | 11 | 0.477268869 | 1.598969046 | 0.031524047 | 0.158772278 | 0.127992373 |
| REACTOME_DEFECTIVE_INTRINSIC_PATHWAY_FOR_APOPTOSIS | 25 | 0.327380329 | 1.550147089 | 0.032500575 | 0.163148581 | 0.131520277 |
| BIOCARTA_SRCRPTP_PATHWAY | 11 | 0.468991507 | 1.571237831 | 0.032846713 | 0.163801374 | 0.132046518 |
| REACTOME_CONDENSATION_OF_PROMETAPHASE_CHROMOSOMES | 11 | 0.468991507 | 1.571237831 | 0.032846713 | 0.163801374 | 0.132046518 |
| BIOCARTA_MHC_PATHWAY | 12 | 0.476027643 | 1.658544281 | 0.033230305 | 0.164094928 | 0.132283163 |
| REACTOME_INTERLEUKIN_2_SIGNALING | 12 | 0.475471336 | 1.656606034 | 0.033230305 | 0.164094928 | 0.132283163 |
| REACTOME_APOPTOTIC_EXECUTION_PHASE | 52 | -0.588048382 | -1.307340092 | 0.033033033 | 0.164094928 | 0.132283163 |
| WP_GLYCOLYSIS_IN_SENESCENCE | 11 | 0.467079931 | 1.564833578 | 0.03416938 | 0.168184353 | 0.135579804 |
| BIOCARTA_RNA_PATHWAY | 10 | 0.51507373 | 1.681380396 | 0.035262177 | 0.172695389 | 0.139216321 |
| REACTOME_NOTCH4_ACTIVATION_AND_TRANSMISSION_OF_SIGNAL_TO_THE_NUCLEUS | 11 | 0.464458341 | 1.556050602 | 0.035492048 | 0.172695389 | 0.139216321 |
| REACTOME_REGULATED_PROTEOLYSIS_OF_P75NTR | 11 | 0.464458341 | 1.556050602 | 0.035492048 | 0.172695389 | 0.139216321 |
| PID_LYMPH_ANGIOGENESIS_PATHWAY | 25 | 0.325447343 | 1.540994392 | 0.035541531 | 0.172695389 | 0.139216321 |
| WP_HOSTPATHOGEN_INTERACTION_OF_HUMAN_CORONAVIRUSES_AUTOPHAGY | 19 | 0.378438174 | 1.653596521 | 0.035900332 | 0.173881482 | 0.140172476 |
| REACTOME_CHK1_CHK2_CDS1_MEDIATED_INACTIVATION_OF_CYCLIN_B_CDK1_COMPLEX | 13 | 0.436354699 | 1.563142787 | 0.036167322 | 0.174616751 | 0.140765205 |
| REACTOME_COHESIN_LOADING_ONTO_CHROMATIN | 10 | 0.513790279 | 1.677190761 | 0.036444137 | 0.174839593 | 0.140944847 |
| REACTOME_POU5F1_OCT4_SOX2_NANOG_REPRESS_GENES_RELATED_TO_DIFFERENTIATION | 10 | 0.512795475 | 1.673943376 | 0.036444137 | 0.174839593 | 0.140944847 |
| WP_IMATINIB_AND_CHRONIC_MYELOID_LEUKEMIA | 20 | 0.383087519 | 1.641350007 | 0.038009022 | 0.181200242 | 0.146072407 |
| REACTOME_VLDLR_INTERNALISATION_AND_DEGRADATION | 16 | 0.382957926 | 1.470348611 | 0.037900109 | 0.181200242 | 0.146072407 |
| REACTOME_RHO_GTPASES_ACTIVATE_ROCKS | 19 | 0.372167492 | 1.626196594 | 0.038441885 | 0.182049026 | 0.146756644 |
| REACTOME_SIGNALING_BY_FGFR2_IIIA_TM | 19 | 0.371664254 | 1.623997681 | 0.038441885 | 0.182049026 | 0.146756644 |
| REACTOME_INFLAMMASOMES | 21 | 0.34297926 | 1.486209997 | 0.03854732 | 0.182049026 | 0.146756644 |
| BIOCARTA_CSK_PATHWAY | 20 | 0.379607621 | 1.62644028 | 0.038773016 | 0.182346857 | 0.146996737 |
| WP_GPR40_PATHWAY | 15 | 0.347887927 | 1.309967913 | 0.038850946 | 0.182346857 | 0.146996737 |
| REACTOME_NUCLEOTIDE_BIOSYNTHESIS | 14 | 0.408482631 | 1.47902131 | 0.039435852 | 0.18452084 | 0.148749268 |
| REACTOME_INTERLEUKIN_21_SIGNALING | 10 | 0.50660995 | 1.653751663 | 0.039596033 | 0.184700264 | 0.148893908 |
| REACTOME_MAP3K8_TPL2_DEPENDENT_MAPK1_3_ACTIVATION | 16 | 0.382039657 | 1.466822959 | 0.039994017 | 0.185415688 | 0.149470639 |
| REACTOME_SPRY_REGULATION_OF_FGF_SIGNALING | 16 | 0.382039657 | 1.466822959 | 0.039994017 | 0.185415688 | 0.149470639 |
| SA_REG_CASCADE_OF_CYCLIN_EXPR | 13 | 0.43243646 | 1.549106576 | 0.04021798 | 0.185885541 | 0.149849405 |
| WP_NOTCH1_REGULATION_OF_ENDOTHELIAL_CELL_CALCIFICATION | 17 | 0.367055417 | 1.498516267 | 0.040396741 | 0.186144255 | 0.150057964 |
| PID_TCR_JNK_PATHWAY | 14 | 0.405751584 | 1.469132821 | 0.0408075 | 0.187467183 | 0.151124427 |
| REACTOME_SYNTHESIS_OF_GLYCOSYLPHOSPHATIDYLINOSITOL_GPI | 17 | 0.366126786 | 1.494725096 | 0.041341684 | 0.189347409 | 0.152640149 |
| REACTOME_E2F_MEDIATED_REGULATION_OF_DNA_REPLICATION | 22 | 0.348639642 | 1.583678783 | 0.041738607 | 0.189791194 | 0.152997901 |
| BIOCARTA_NDKDYNAMIN_PATHWAY | 17 | 0.366017535 | 1.494279076 | 0.041814155 | 0.189791194 | 0.152997901 |
| REACTOME_ELEVATION_OF_CYTOSOLIC_CA2_LEVELS | 16 | 0.379207232 | 1.455948 | 0.041669144 | 0.189791194 | 0.152997901 |
| REACTOME_PECAM1_INTERACTIONS | 12 | 0.459524917 | 1.601046567 | 0.042362139 | 0.191704488 | 0.154540279 |
| BIOCARTA_MITOCHONDRIA_PATHWAY | 19 | 0.368823578 | 1.611585264 | 0.04288961 | 0.193513835 | 0.155998863 |
| REACTOME_REGULATION_OF_COMMISSURAL_AXON_PATHFINDING_BY_SLIT_AND_ROBO | 10 | 0.495581834 | 1.617752043 | 0.043157447 | 0.194144478 | 0.156507248 |
| REACTOME_RNA_POLYMERASE_III_CHAIN_ELONGATION | 18 | 0.371654102 | 1.564000372 | 0.043832981 | 0.196599996 | 0.158486735 |
| REACTOME_JNK_C_JUN_KINASES_PHOSPHORYLATION_AND_ACTIVATION_MEDIATED_BY_ACTIVATED_HUMAN_TAK1 | 22 | 0.346782124 | 1.575241099 | 0.044151217 | 0.197243302 | 0.159005328 |
| REACTOME_TP53_REGULATES_TRANSCRIPTION_OF_GENES_INVOLVED_IN_G1_CELL_CYCLE_ARREST | 14 | 0.397558444 | 1.439467354 | 0.044236624 | 0.197243302 | 0.159005328 |
| BIOCARTA_PGC1A_PATHWAY | 15 | 0.337511949 | 1.27089729 | 0.044660276 | 0.198548322 | 0.160057355 |
